# Supplementary material
Source: Springer Nature journal article supplement (https://www.springermedizin.de/resource/supplementary/13054_2013_2969_MOESM2_ESM.pdf/9712000)
Supplement: MOESM2 [file 9712000]

Subgroup

N

Propensity score adjusted hazard ratio (95% CI)

**Overall**

Propensity score adjusted 7,404 0.84 (0.75–0.94)

**Age group (years)**

15–39 185 1.38 (0.49–3.88)  
 40–59 1,279 0.99 (0.66–1.48)  
 60–79 4,635 0.81 (0.70–0.94)  
 80+ 1,305 0.84 (0.67–1.06)

**Sex**

Female 3,004 0.89 (0.75–1.06)  
 Male 4,400 0.80 (0.69–0.94)

**Preadmission chronic diseases**

Kidney disease 573 0.65 (0.35–1.20)  
 No kidney disease 6,831 0.85 (0.75–0.96)  
 Pulmonary disease 767 0.82 (0.52–1.30)  
 No pulmonary disease 6,637 0.84 (0.75–0.95)  
 Clinical obesity 768 0.94 (0.67–1.32)  
 No clinical obesity 6,636 0.83 (0.73–0.94)

**Other preadmission medication**

Insulin use 2,023 0.74 (0.58–0.95)  
 No insulin use 5,381 0.88 (0.77–1.00)  
 Statin use 3,775 0.79 (0.68–0.93)  
 No statin use 3,629 0.90 (0.76–1.06)  
 Beta-blocker use 2,859 0.80 (0.66–0.97)  
 No beta-blocker use 4,545 0.87 (0.75–1.00)  
 Aspirin use 2,745 0.83 (0.69–1.00)  
 No aspirin use 4,659 0.85 (0.73–0.98)

**Days from hospital to ICU admission**

0 3,313 0.85 (0.73–1.00)  
 1 2,216 0.97 (0.75–1.25)  
 >1 1,875 0.77 (0.61–0.96)

**Diagnostic category**

Pneumonia 284 1.13 (0.68–1.90)  
 Septicemia 255 0.76 (0.50–1.16)  
 Other infectious disease 437 0.46 (0.24–0.90)  
 Diabetes 214 0.83 (0.30–2.32)  
 Other endocrinology 133 1.31 (0.55–3.16)  
 Cardiovascular disease 2,259 0.88 (0.71–1.09)  
 Respiratory disease 539 0.98 (0.70–1.38)  
 Gastrointestinal/liver disease 872 0.90 (0.65–1.23)  
 Cancer 828 0.55 (0.36–0.86)  
 Trauma/poisoning 633 0.82 (0.52–1.30)  
 Other 950 0.87 (0.62–1.20)

**Surgery at or before ICU admission**

No surgery 2,983 0.85 (0.73–1.00)  
 Acute, non-cardiac surgery 2,096 0.87 (0.71–1.06)  
 Acute, cardiac surgery 269 1.36 (0.81–2.28)  
 Elective, non-cardiac surgery 1,029 0.71 (0.42–1.18)  
 Elective, cardiac surgery 1,027 0.74 (0.31–1.78)

**Hemoglobin A1c level**

< 6.50% 1,578 0.87 (0.68–1.11)  
 6.50%–6.99% 1,396 0.53 (0.38–0.73)  
 7.00%–7.99% 1,460 1.02 (0.79–1.32)  
 ≥ 8% 1,374 1.00 (0.77–1.29)  
 Missing 1,596 0.79 (0.61–1.01)

**Mechanical ventilation**

No 4,303 0.82 (0.68–0.98)  
 Yes 3,101 0.82 (0.71–0.96)

0.3 0.4 0.5 0.6 0.8 1 1.5 2 2.5
